# Supplementary material for: Identification of Potential Migrants in Polyethylene Terephthalate Samples of Ecuadorian Market
Source: MDPI journal article supplement (doi:10.3390/polym13213769), 2021-10-31
Supplement: s1 [file s1]

## Supplementary information

### Identification of potential migrants in Polyethylene terephthalate samples of Ecuadorian market

Karina Marín-Morocho <sup>a</sup>, Sandra Domenek <sup>b</sup>, Rómulo Salazar <sup>a,\*</sup>

<sup>a</sup> Escuela Superior Politécnica del Litoral, ESPOL, Facultad de Ingeniería en Mecánica y Ciencias de la Producción, Carrera de Ingeniería en Alimentos, Campus Gustavo Galindo Km 30.5 Vía Perimetral, P.O. Box 09-01-5863, Guayaquil, Ecuador

<sup>b</sup> UMR Ingénierie Procédés Aliments, AgroParisTech, INRA, Université Paris-Saclay, F-91300, Massy, France.

\* Corresponding author: rvsalaza@espol.edu.ec

---

### Tables presenting the information gathered on the non-identified peaks present in the PET bottles sampled on the Ecuadorian market

**Table S1:** Unknown substances found in PET bottles P.

| t (min) | Compounds | m/z ratio          | KI <sup>a</sup> |
|---------|-----------|--------------------|-----------------|
| 10.42   | unknown   | 117, 201, 119, 203 | 1066            |
| 40.40   | unknown   | 149, 57, 150, 223  | 1836            |
| 41.97   | unknown   | 149, 57, 71, 85    | 1877            |
| 42.75   | unknown   | 74, 87, 55, 75     | 1905            |
| 43.53   | unknown   | 149, 150, 223, 104 | 1927            |
| 45.20   | unknown   | 57, 71, 85, 55, 99 | 1974            |
| 48.90   | unknown   | 71, 57, 85, 69, 99 | 2096            |
| 51.23   | unknown   | 57, 71, 85, 55, 99 | 2157            |
| 54.09   | unknown   | 57, 71, 85, 55, 69 | 2257            |
| 56.82   | unknown   | 57, 71, 85, 55, 69 | 2361            |
| 59.45   | unknown   | 57, 71, 85, 55, 69 | 2462            |
| 59.71   | unknown   | 55, 69, 83, 97, 57 | 2473            |
| 60.04   | unknown   | 149, 167, 57, 71   | 2485            |

<sup>a</sup> Kovats index calculated in a DB5MS column.

**Table S2:** Unknown substances found in PET bottles T.

| <b>t (min)</b> | <b>Compounds</b> | <b>m/z ratio</b>   | <b>KI<sup>a</sup></b> |
|----------------|------------------|--------------------|-----------------------|
| 10.45          | unknown          | 201, 117, 119, 203 | 1066                  |
| 18.43          | unknown          | 91, 136, 119, 65   | 1311                  |
| 40.40          | unknown          | 149, 57, 150, 223  | 1836                  |
| 40.80          | unknown          | 57, 73, 171, 71    | 1846                  |
| 42.80          | unknown          | 74, 87, 57, 55     | 1906                  |
| 43.56          | unknown          | 149, 57, 150, 71   | 1928                  |
| 51.09          | unknown          | 88, 101, 57, 55    | 2154                  |
| 54.14          | unknown          | 57, 71, 85, 55     | 2260                  |
| 56.86          | unknown          | 57, 71, 85, 55     | 2362                  |
| 60.08          | unknown          | 149, 167, 57, 71   | 2489                  |

<sup>a</sup> Kovats index calculated in a DB5MS column.

**Table S3:** Unknown substances found in PET bottles A.

| <b>t (min)</b> | <b>Compounds</b> | <b>m/z ratio</b>   | <b>KI<sup>a</sup></b> |
|----------------|------------------|--------------------|-----------------------|
| 6.61           | unknown          | 143, 145, 83, 147  | 931                   |
| 10.42          | unknown          | 201, 117, 119, 203 | 1066                  |
| 12.37          | unknown          | 96, 143, 145, 83   | 1121                  |
| 14.48          | unknown          | 128, 56, 127, 129  | 1174                  |
| 37.30          | unknown          | 57, 73, 60, 55, 71 | 1743                  |
| 38.56          | unknown          | 57, 71, 85, 55, 99 | 1784                  |
| 40.39          | unknown          | 149, 57, 150, 223  | 1835                  |
| 41.94          | unknown          | 149, 57, 71, 85    | 1877                  |
| 42.74          | unknown          | 74, 87, 55, 75     | 1905                  |
| 43.51          | unknown          | 149, 150, 223, 104 | 1927                  |
| 45.18          | unknown          | 57, 71, 85, 55     | 1974                  |
| 51.23          | unknown          | 57, 71, 85, 55     | 2157                  |
| 54.04          | unknown          | 57, 71, 85, 55     | 2255                  |
| 56.78          | unknown          | 57, 71, 85, 55     | 2359                  |
| 59.99          | unknown          | 149, 167, 57, 71   | 2485                  |

<sup>a</sup> Kovats index calculated in a DB5MS column.

**Table S4:** Unknown substances found in PET bottles D.

| t (min) | Compounds | m/z ratio         | KI <sup>a</sup> |
|---------|-----------|-------------------|-----------------|
| 6.52    | unknown   | 83, 85, 95, 131   | 926             |
| 6.71    | unknown   | 79, 103, 75, 107  | 935             |
| 21.32   | unknown   | 71, 83, 56, 98    | 1356            |
| 22.29   | unknown   | 71, 89, 56, 73    | 1373            |
| 34.93   | unknown   | 71, 57, 85, 99    | 1672            |
| 36.54   | unknown   | 71, 57, 85, 99    | 1717            |
| 40.43   | unknown   | 149, 57, 150, 223 | 1835            |
| 42.78   | unknown   | 74, 87, 177, 195  | 1898            |
| 43.59   | unknown   | 149, 150, 57, 223 | 1920            |
| 51.09   | unknown   | 88, 101, 57, 55   | 2154            |
| 59.46   | unknown   | 57, 71, 85, 55    | 2462            |
| 60.10   | unknown   | 149, 167, 57, 71  | 2490            |

<sup>a</sup> Kovats index calculated in a DB5MS column.

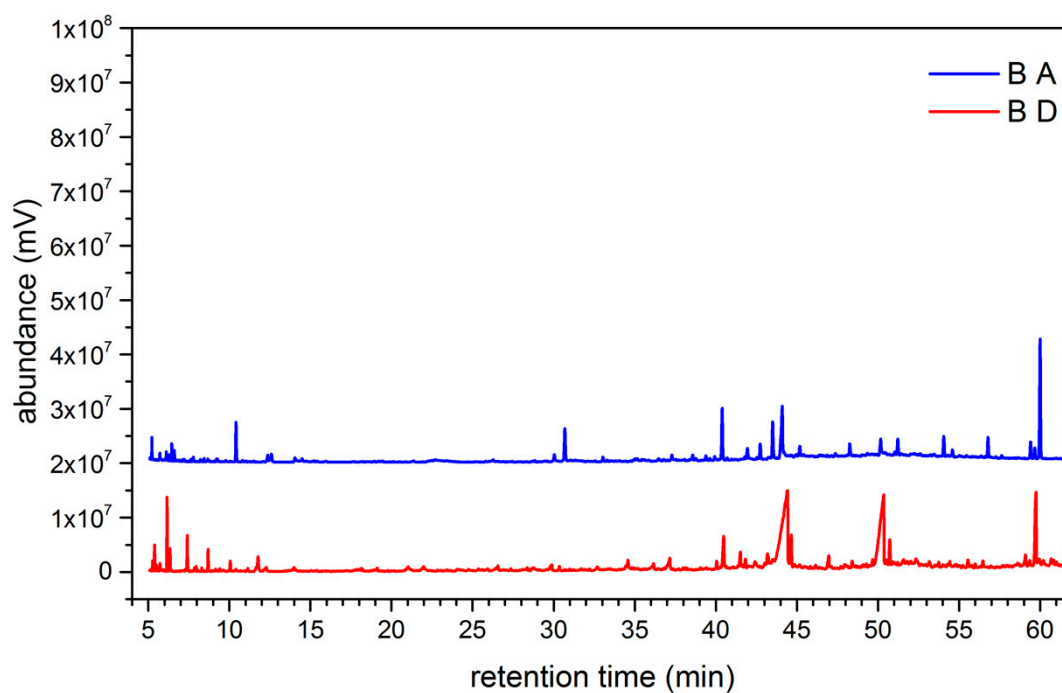**Figure S1:** Chromatograms of PET bottles A and D.
